# Supplementary material
Source: MDPI journal article supplement (https://www.mdpi.com/2227-7080/1/1/3)
Supplement: s1 [file s1]

**OPEN ACCESS**

technologies

**ISSN 2227-7080**

www.mdpi.com/journal/technologies

Supplementary Information

Social Robots, Brain Machine Interfaces and Neuro/Cognitive Enhancers: Three Emerging Science and Technology Products through the Lens of Technology Acceptance Theories, Models and Frameworks. *Technologies*, *2013*, *1*, 3–25

Gregor Wolbring 1,*, Lucy Diep 1,†, Sophya Yumakulov 1,†, Natalie Ball 2,† and Dean Yergens 1

1Department of Community Health Sciences, University of Calgary, Calgary, AB T2N4N1, Canada; E-Mails: ldiep@ucalgary.ca (L.D.); sophya.yumakulov@gmail.com (S.Y.);
dyergens@ucalgary.ca (D.Y.)

2Faculty of Medicine, University of Calgary, Calgary, AB T2N4N1, Canada;
E-Mail: neball@ucalgary.ca

**†** These authors contributed equally to this work.

***** Author to whom correspondence should be addressed; E-Mail: gwolbrin@ucalgary.ca;
Tel.: +1-403-210-7083; Fax: +1-403-220-6494.

**Table S1(a).** Core Measures of technology assessment models covered in the Neuroenhancement/Cognitive Enhancement literature.

| **Theory** | **Core measure** | **Neuroenhancement/Cognitive Enhancement** |
| --- | --- | --- |
| Theory of Reasoned Action (TRA) | Attitude Toward It  (an individual’s positive or negative feeling about performing the target behavior | According to a pilot study, 11.42% of high school students would not use cognitive enhancements under any  circumstance [1]. 94.29% believed that cognitive enhancement would lead to addiction [1]. |
| Subjective Norm the person’s perception that most people who are important to him think he should or should not perform the behavior I question | 33.01% of participants believed that it was not at all fair to use cognitive enhancements because others were, whereas only 2.52% believed that it was definitely fair to use them under those circumstances [1]).  Only 6.68% of participants would consider using CE just because their friends do, and 7.07% if their employer advised their use (compared to 83.25% who would consider CE if it had no side-effects) [1]). |

**Table S1(a).** *Cont.*

| **Theory** | | **Core measure** | | **Neuroenhancement/Cognitive Enhancement** | |
| --- | --- | --- | --- | --- | --- |
| TAM | | Perceived usefulness  (increase job performance) | | As commercialization and positive portrayal of neuroenhancements increase, people are likely to adopt a positive attitude towards them and they may feel attracted or even entitled to use neuroenhancement [2,3]. However, we could find no data to show how strong of a predictor positive portrayal had on actual use of cognitive enhancement. | |
| Perceived ease of use | | Some authors acknowledge that cognitive enhancements may be seen by users as a short cut to gaining intelligence and other cognitive abilities [4,5]. | |
| Subjective norm | | Authors speculate that as neuroenhancements are seen as effective and safe, more people will use them, changing the standard of what is “normal”, and others will feel the need to use in order to keep up [6–8]. However, as previously mentioned, only 6.68% of participants would consider using CE just because their friends do, and 7.07% if their employer advised their use [1]. | |
| Motivational model | | Extrinsic motivation  (users want to perform an action because its perceived to achieve a valued outcome that is outside of the activity like jobs…) | | The competitiveness of our society makes neuroenhancements look attractive [9–11]. People want to keep a competitive edge and they don’t want to fall behind.  Efficiency—if we improve the technology, enhancers could replace years of expensive schooling with a drug regimen [12] and we could be more efficient at work, able to work longer hours with greater concentration [13].  Economic gain—if decreased intelligence results in lost revenue, increased intelligence should have economic gains [12]. | |
| Intrinsic motivation (for no external reason but purely for the process of performing the activity per se | | Performance—at school [1,4,7,10,14–16] at work [4,10,13,15]. | |
| Theory of Planned behavior | | Attitude towards behavior | | According to a pilot study, 11.42% of high school students would not use cognitive enhancements under any  circumstance [1] 94.29% believed that cognitive enhancement would lead to addiction [1] | |
| Subjective norm | | Authors speculate that as neuroenhancements are seen as effective and safe, more people will use them, changing the standard of what is “normal”, and others will feel the need to use in order to keep up [6–8]. However, as previously mentioned, only 6.68% of participants would consider using CE just because their friends do, and 7.07% if their employer advised their use [1] | |
| Perceived behavioral control (the perceived ease or difficulty of performing the behavior) (perception of internal and external constraints on behaviour ) | | Some authors acknowledge that cognitive enhancements may be seen by users as a short cut to gaining intelligence and other cognitive abilities [4,5] | |

**Table S1(a).** *Cont.*

| **Theory** | | **Core measure** | | **Neuroenhancement/Cognitive Enhancement** | |
| --- | --- | --- | --- | --- | --- |
| Model of PC utilization | | Job fit | | Employers may pressure employees into using cognitive enhancements. If neuroenhancements are made legal and easily accessible, people may be coerced into using neuroenhancements or else risk losing their job/advancement in their career [4,7,8,13,17]  In highly demanding jobs like being a surgeon or military personnel, neuroenhancements have already been used to cope with the intensity of the profession [13,18–21] | |
| Complexities | |  | |
| Long term consequences (pay-off in the future) | | Efficiency—if we improve the technology, enhancers could replace years of expensive schooling with a drug regimen [12] and we could be more efficient at work, able to work longer hours with greater concentration [13]  Economic gain—if decreased intelligence results in lost revenue, increased intelligence should have economic gains [12]  Performance—at school [1,4,7,10,14–16] at work[4,10,13,15]  Undetermined safety [1,22]  Possibility of coercion [17]  Possibility of exacerbating inequalities [4,7,14,16,17,23]  Increasing standards of what is considered ‘normal,’ thereby creating feelings of deficiency and inadequacy among the  non-enhanced [4,24] | |
| Affect towards use (positive or negative feeling towards it) | | According to a pilot study, 11.42% of high school students would not use cognitive enhancements under any circumstance (94.29% believed that cognitive enhancement would lead to addiction [1].) | |
| Social factors (internalization of the reference group subjective culture, and interpersonal arguments) | | Increasing standards of what is considered “normal”, thereby creating feelings of deficiency and inadequacy among the  non-enhanced [4,24]. 33.01% of participants believed that it was not at all fair to use cognitive enhancements because others were, whereas only 2.52% believed that it was definitely fair to use them under those circumstances [1]. Only 6.68% of participants would consider using CE just because their friends do, and 7.07% if their employer advised their use (compared to 83.25% who would consider CE if it had no side-effects). | |
| Facilitating conditions  Objective factors in the environment that observers agree make an act easy to accomplish ) | | The competitiveness of our society makes neuroenhancements look attractive [9–11]. People want to keep a competitive edge and they don’t want to fall behind.  Commercialization and positive media portrayal [2,3] | |

**Table S1(a).** *Cont.*

| **Theory** | **Core measure** | | **Neuroenhancement/Cognitive Enhancement** | | |
| --- | --- | --- | --- | --- | --- |
| Innovation Diffusion Theory | | Relative advantage | | Efficiency—if we improve the technology, enhancers could replace years of expensive schooling with a drug regimen [12] and we could be more efficient at work, able to work longer hours with greater concentration [13]  Economic gain—if decreased intelligence results in lost revenue, increased intelligence should have economic gains [12]  Performance—at school [1,4,7,10,14–16] at work [4,10,13,15]  Undetermined safety [1,22]  Possibility of coercion [17]  Possibility of exacerbating inequalities [4,7,14,16,17,23]  Increasing standards of what is considered “normal”, thereby creating feelings of deficiency and inadequacy among the  non-enhanced [4,24] |
| Image (enhance ones image) | | Performance—at school [1,4,7,10,14–16] at work [4,10,13,15]  Increasing standards of what is considered “normal”, thereby creating feelings of deficiency and inadequacy among the  non-enhanced [4,24]  We could be more efficient at work, able to work longer hours with greater concentration [13] |
| Visibility  (one can see others using it) | | Authors speculate that as neuroenhancements are seen as effective and safe, more people will use them, changing the standard of what is “normal”, and others will feel the need to use in order to keep  up [6–8]. However, as previously mentioned, only 6.68% of participants would consider using CE just because their friends do, and 7.07% if their employer advised their use [1] |
| Compatibility  Perceived as being consistent with the existing values needs and past experiences of potential adopters ) | | The competitiveness of our society makes neuroenhancements look attractive [9–11]. People want to keep a competitive edge and they don’t want to fall behind.  Efficiency—if we improve the technology, enhancers could replace years of expensive schooling with a drug regimen [12] and we could be more efficient at work, able to work longer hours with greater concentration [13]  Economic gain—if decreased intelligence results in lost revenue, increased intelligence should have economic gains [12]  Performance—at school [1,4,10,14,15], at work [4,10,15,25]  Goes against values of safety, free will, equality  Undetermined safety [1,22]  Possibility of coercion [17]  Possibility of exacerbating inequalities [4,7,14,16,17,23] |
| Results demonstrability | | Lack of efficacy [26]. Current neuroenhancers don’t seem to have a pronounced or global effect on intelligence or cognitive function [27]  Undetermined safety [1,22] |
| Voluntariness of use | | Authors speculate that as neuroenhancements are seen as effective and safe, more people will use them, changing the standard of what is “normal”, and others will feel the need to use in order to keep up [6–8]. However, as previously mentioned, only 6.68% of participants would consider using CE just because their friends do, and 7.07% if their employer advised their use [1] |

**Table S1(a).** *Cont.*

| **Theory** | **Core measure** | | **Neuroenhancement/Cognitive Enhancement** | | |
| --- | --- | --- | --- | --- | --- |
| Social cognitive theory | | Outcome expectations––Performance  (consequences) | | Performance—at school [1,4,7,10,14–16] at work [4,10,13,15]  Increasing standards of what is considered ‘normal,’ thereby creating feelings of deficiency and inadequacy among the  non-enhanced [4,24]  We could be more efficient at work, able to work longer hours with greater [13] |
| Outcome expectation personal  Personal consequence such as esteem and sense of accomplishment | | Performance—at school [1,4,7,10,14–16] at work [4,10,13,15]  Increasing standards of what is considered ‘normal,’ thereby creating feelings of deficiency and inadequacy among the  non-enhanced [4,24]  We could be more efficient at work, able to work longer hours with greater concentration [13] |
| Self efficacy | | Efficiency—if we improve the technology, enhancers could replace years of expensive schooling with a drug regimen [12] and we could be more efficient at work, able to work longer hours with greater concentration [13] |
| Affect (liking) | | According to a pilot study, 11.42% of high school students would not use cognitive enhancements under any circumstance [1]. 94.29% believed that cognitive enhancement would lead  to addiction. |
| Anxiety | | The greatest predictors of considering using CE were if CE had no side effects (83.25% would consider), no risk of long-term damage (82.48% would consider), no risk of addiction (81.90% would consider). 94.29% believed that cognitive enhancement would lead to addiction [1] |
| UTAUT | | Performance Expectancy | | We could be more efficient at work, able to work longer hours with greater concentration [13]  Performance—at school[1,4,7,10,14–16] at work [4,10,13,15]  Lack of efficacy [26]. Current neuroenhancers don’t seem to have a pronounced or global effect on intelligence or cognitive function [27] |
| Effort Expectancy | | If we improve the technology, enhancers could replace years of expensive schooling with a drug regimen [12] and we could be more efficient at work, able to work longer hours with greater concentration [13]  Some authors acknowledge that cognitive enhancements may be seen by users as a short cut to gaining intelligence and other cognitive abilities [4,5] |
| Social Influence | | 33.01% of participants believed that it was not at all fair to use cognitive enhancements because others were, whereas only 2.52% believed that it was definitely fair to use them under those circumstances [1]. Only 6.68% of participants would consider using CE just because their friends do, and 7.07% if their employer advised their use (compared to 83.25% who would consider CE if it had no side-effects). |
| Facilitating Conditions  Age Gender, Experience, Voluntariness | | In a pilot study, males saw neuroenhancement as more acceptable [1] |

**Table S1(a).** *Cont.*

| **Theory** | **Core measure** | | **Neuroenhancement/Cognitive Enhancement** | | |
| --- | --- | --- | --- | --- | --- |
| UTAUT2 | | Performance Expectancy | | We could be more efficient at work, able to work longer hours with greater concentration [13]  Performance—at school[1,4,7,10,14–16] at work [4,10,13,15]  Lack of efficacy [26]. Current neuroenhancers don’t seem to have a pronounced or global effect on intelligence or cognitive function [27] |
| Effort Expectancy | | If we improve the technology, enhancers could replace years of expensive schooling with a drug regimen [12] and we could be more efficient at work, able to work longer hours with greater concentration [13]. Some authors acknowledge that cognitive enhancements may be seen by users as a short cut to gaining intelligence and other cognitive abilities [4,5] |
| Social Influence | | 33.01% of participants believed that it was not at all fair to use cognitive enhancements because others were, whereas only 2.52% believed that it was definitely fair to use them under those circumstances [1]. Only 6.68% of participants would consider using CE just because their friends do, and 7.07% if their employer advised their use (compared to 83.25% who would consider CE if it had no side-effects). |
| Facilitating Conditions  Age Gender Experience | | In a pilot study, males saw neuroenhancement as more acceptable [1] |
| Hedonistic Motivation | | Performance—at school [1,4,7,10,14–16] at work [4,10,13,15]  Increasing standards of what is considered ‘normal,’ thereby creating feelings of deficiency and inadequacy among the non-enhanced [4,24]  We could be more efficient at work, able to work longer hours with greater concentration [13]  Undetermined safety [1,22]  Lack of efficacy [26]. Current neuroenhancers don’t seem to have a pronounced or global effect on intelligence or cognitive function [27] |
| Price Value | | Lack of efficacy [26]. Current neuroenhancers don’t seem to have a pronounced or global effect on intelligence or cognitive function [27]  Economic gain—if decreased intelligence results in lost revenue, increased intelligence should have economic gains [12] |
| Habit | | The competitiveness of our society makes neuroenhancements look attractive [9–11]. People want to keep a competitive edge and they don’t want to fall behind. |
| Behavioural Intention | |  |

**Table S1(a).** *Cont.*

| **Theory** | **Core measure** | **Neuroenhancement/Cognitive Enhancement** |
| --- | --- | --- |
| Consumer choice | Social factors  Family  Friends  Other people  Trends  Gender  Age  Entertainment | 33.01% of participants believed that it was not at all fair to use cognitive enhancements because others were, whereas only 2.52% believed that it was definitely fair to use them under those circumstances [1]. Only 6.68% of participants would consider using CE just because their friends do, and 7.07% if their employer advised their use (compared to 83.25% who would consider CE if it had no side-effects). |
| Environmental factors  Lifestyle | The competitiveness of our society makes neuroenhancements look attractive [9–11]. People want to keep a competitive edge and they don’t want to fall behind.  Commercialization and positive media portrayal [2,3] |
| Personal factors  Needs  Wants  Likes  Time  Values  Emotion  Knowledge  Hobbies  Economic factors  Affordability  Value for money | The competitiveness of our society makes neuroenhancements look attractive [9–11]. People want to keep a competitive edge and they don’t want to fall behind.  Lack of efficacy currently  Efficiency—if we improve the technology, enhancers could replace years of expensive schooling with a drug regimen [12] and we could be more efficient at work, able to work longer hours with greater concentration [13]  Economic gain—if decreased intelligence results in lost revenue, increased intelligence should have economic gains [12] |
| Psychological factors  Planned buying  Impulse buying  To bribe award or encourage someone  Emotions  Celebration  Advertisement | Possibility of coercion [17]  This could be direct or “soft coercion”––feeling forced to do something because everyone else is  Commercialization and positive media portrayal [2,3] |
| Social determination theory | Intrinsic motivation  Competence  Autonomy  Relatedness  Interest  Enjoyment  Inherent satisfaction | Performance—at school [1,4,10,14,15], at work [4,10,15,25] |
| External motivation  Compliance  External rewards and punishment | Efficiency—if we improve the technology, enhancers could replace years of expensive schooling with a drug regimen [12] and we could be more efficient at work, able to work longer hours with greater concentration [13]  Economic gain—if decreased intelligence results in lost revenue, increased intelligence should have economic gains [12]  Performance—at school [1,4,10,14,15], at work [4,10,15,25]  Undetermined safety [1,22]  Possibility of coercion [17]  Possibility of exacerbating inequalities [23]  Increasing standards of what is considered “normal”, thereby creating feelings of deficiency and inadequacy among the  non-enhanced [4] |

**Table S1(b).** Core measures of technology assessment models covered in the Brain Machine Interface literature.

| **Theory** | **Core Measure** | **BMI for Enhancement Purposes** | **BMI for Restorative Purposes** |
| --- | --- | --- | --- |
| Theory of Reasoned Action (TRA) | Attitude Toward It  (an individual’s positive or negative feeling about performing the target behavior | Authenticity––native or achieved excellence has higher worth than purchased talent [28]  Authenticity––questions the extent of “free choice” if our minds are regarded as external domains [28] | Safety risks with invasive/partially-invasive surgical procedures [29] Cosmetics of the technology [30]  Anthropomorphism [31,32] |
| Subjective Norm the person’s perception that most people who are important to him think he should or should not perform the behavior I question | Relatively new technology with little knowledge about the potential uses, safety, efficacy or social consequences [28]  Potential cost-benefit ratio (cheap pill *vs.* years of education) [28]  Controversial [28] | “To provide a better tool for communicating with paralyzed individuals” [33]  “Restoring motor skills through robot manipulators controlled by brain signals would improve the quality of life of these individuals dramatically” [34]  Improved quality of life; positive interaction with social environment [35,36] |
| TAM | Perceived usefulness  (increase job performance) | For persons with disabilities: Access to hardware and software through the use of thought [28] | Serve as useful for individuals with non-muscular communication and control, typically required for conventional technologies [37]  Surgical application: useful for performing remote surgery [34] |
| Perceived ease of use | For non-disabled: Access to hardware and software could be achieved at a lower cost (monetary and safety) with the use of eye, finger, or voice control [28] | Controlling the environment using thought [38] |
| Subjective norm | *See subjective norm of TRA* | *See subjective norm of TRA* |

**Table S1(b).** *Cont*.

| **Theory** | **Core Measure** | **BMI for Enhancement Purposes** | **BMI for Restorative Purposes** |
| --- | --- | --- | --- |
| Motivational model | Extrinsic motivation  (users want to perform an action because its perceived to achieve a valued outcome that is outside of the activity like jobs…) | Potential to play a positive role. Allowing a person to lead a more authentic life by basing choices on more deeply considered beliefs of unique circumstances, personal style, ideals, and options [28] | Allows for social interaction and relationship  building [30]  Allows for direct communication with from the brain to the external world [30] |
| Intrinsic motivation (for no external reason but purely for the process of performing the activity per se |  | Controlling the environment using thought [38] |
| Theory of Planned behavior | Attitude towards behavior |  |  |
| Subjective norm | *See subjective norm of TRA* | *See subjective norm of TRA* |
| Perceived behavioral control  (the perceived ease or difficulty of performing the behavior), (perception of internal and external constraints on behaviour ) |  |  |
| Model of PC utilization | Job fit |  |  |
| Complexities |  | Developing training methods to learn how to gain and control  movement [37]  Developing an algorithm to translate neural signals to the technological device [30]  Developing accurate and objective procedures to evaluate technology performance [30]  Long-term performance assessment of  technology [30]  Unknown capacities and limitations of non-muscular communication  channels [30]  Extent of control required by normal brain function [30]  Quality and amount of sensory feedback by technology [30]  Delays [30] |

**Table S1(b).** *Cont*.

| **Theory** | **Core Measure** | **BMI for Enhancement Purposes** | **BMI for Restorative Purposes** |
| --- | --- | --- | --- |
| Model of PC utilization | Long term consequences (pay-off in the future) |  |  |
| Affect towards use (positive or negative feeling  towards it) |  |  |
| Social factors (internalization of the reference group subjective culture, and interpersonal arguments) |  |  |
| Facilitating conditions  Objective factors in the environment that observers agree make an act easy to accomplish |  | Allows for social interaction and relationship  building [30]  Allows for direct communication with from the brain to the external world [30] |
| Innovation Diffusion Theory | Relative advantage |  | Benefit to medicine––neuroscience has made considerable progress in treating diseases and conditions [39] |
| Image (enhance ones image) | Cognitive enhancements may exacerbate social inequality; added advantage to the elite if technology is not made affordable [28] |  |
| Visibility  (one can see others using it) |  |  |
| Compatibility  Perceived as being consistent with the existing values needs and past experiences of potential adopters |  |  |
| Results demonstrability |  |  |
| Voluntariness of use |  |  |
| Social cognitive theory | Outcome expectations––Performance (consequences) |  | Exploitation as a result of abuse of technology, threatening own species [39] |
| Outcome expectation personal  Personal consequence such as esteem and sense of accomplishment |  | Intervention is perceived as a “medical cure” [40] |
| Self efficacy |  |  |
| Affect (liking) |  |  |
| Anxiety |  |  |

**Table S1(b).** *Cont*.

| **Theory** | **Core Measure** | **BMI for Enhancement Purposes** | **BMI for Restorative Purposes** |
| --- | --- | --- | --- |
| UTAUT | Performance Expectancy |  |  |
| Effort Expectancy |  |  |
| Social Influence |  |  |
| Facilitating Conditions  Age Gender, Experience, Voluntariness |  |  |
| UTAUT2 | Performance Expectancy |  |  |
| Effort Expectancy |  |  |
| Social Influence |  |  |
| Facilitating Conditions  Age Gender Experience |  |  |
| Hedonistic Motivation | Costly but with increased demand will mean increased affordability |  |
| Price Value |  |  |
| Habit |  |  |
| Behavioural Intention |  | Allows for social interaction and relationship  building [30]  Allows for direct communication with from the brain to the external world [30]  Gaming and  entertainment [41]  Connecting to other devices (TV, computer, light switches) [42]  Sport application [43] |
| Consumer choice | Social factors  Family  Friends  Other people  Trends  Gender  Age  Entertainment |  | Improved quality of life  Positive interaction with social environment [35]  Giving individuals a voice; relieving end-of-life  issues [29,37] |
| Environmental factors  Lifestyle |  | User autonomy (user feels that they are in control of the device, not vice  versa) [33,39] |

**Table S1(b).** *Cont*.

| **Theory** | **Core Measure** | **BMI for Enhancement Purposes** | **BMI for Restorative Purposes** |
| --- | --- | --- | --- |
| Consumer choice | Personal factors  Needs  Wants  Likes  Time  Values  Emotion  Knowledge  Hobbies | Cognitive enhancements may exacerbate social inequality; added advantage to the elite if technology is not made affordable [28] | Increase demand = increase affordability [44] |
| Economic factors  Affordability  Value for money |  | Media portrayal as “medical cure” [40] |
| Psychological factors  Planned buying  Impulse buying  To bribe award or encourage someone  Emotions  Celebration  Advertisement |  | User autonomy (user feels that they are in control of the device, not vice  versa) [33,39] |
| Social determination theory | Intrinsic motivation  Competence  Autonomy  Relatedness  Interest  Enjoyment  Inherent satisfaction |  | How widely should BMI technology be used? Should there be a limit placed on the extent and the way in which they are used? [39] |
| External motivation  Compliance  External rewards and punishment | BMI for enhancement purposes | BMI for restorative purposes |

**Table S1(c).** Core Measures of technology assessment models covered in the Social
Robotics literature.

| **Theory** | **Core measure** | **Social robotics** |
| --- | --- | --- |
| Theory of Reasoned Action (TRA) | Attitude Toward It  (an individual’s positive or negative feeling about performing the target behavior | Positive personal experiences with robots––such as with sex robots, entertainment value, pleasure gains [45]  Perceived utility [46]  Providing individual with more independence [45,47,48]  Robots that make life easier would be more readily accepted [48]  Older generations generally less accepting of technology [49]  Overly human-like robots are perceived as eerie/creepy [49]  Perceived lack of control [45]  Fear of obsolescence [45] |
| Subjective Norm the person’s perception that most people who are important to him think he should or should not perform the behavior I question | Social pressures for adoptions, media influence, social status implications [45]  Positive view of the public [46]  Negative public views––Frankenstein-like fears of robots [46] |
| TAM | Perceived usefulness  (increase job performance) | Perceived utility [46,50]  Robots taking over dangerous jobs [48]  Relieve human resource pressures, especially in  eldercare [47,49,51–58] |
| Perceived ease of use | User friendly interfaces [59] |
| Subjective norm |  |
| Motivational model | Extrinsic motivation  (users want to perform an action because its perceived to achieve a valued outcome that is outside of the activity like jobs…) | Concerns about employment––robots are able to do certain jobs better than humans, and thus, unemployment among those industries will increase (as with other eras when mechanization put people out of work) [48]  Lack of social acceptance––such as the inability to conceal a robot from others [45] |
| Intrinsic motivation  for no external reason but purely for the process of performing the activity per se |  |
| Theory of Planned behavior | Attitude towards behavior | **User acceptance**  Perceived usefulness of robots [46]  Positive public views towards robots [46] facilitated by well-defined social roles for the robot [60]; social pressures for adoptions [45]  Accessibility and usability [45]  User-friendly interfaces [59], ease of use [45]  More public knowledge of robotics [48]  Novelty [48]  Sociable robots––robots that communicate as humans do [45]  Entertainment value and pleasure gains [45]  Media influence [45]  Social status gain [45]  Perceived utility [45]  Perceived control of the robot [45]  Perception of the robot as a toy [45]  Positive personal experiences with robots––such as with sex robots [45] |

**Table S1(c).** *Cont*.

| **Theory** | **Core Measure** | **Social Robotics** |
| --- | --- | --- |
| Theory of Planned behavior | Attitude towards behavior | **Lack of user acceptance**  Older generations less accepting of technology in general [49]  Robots are not humans, lack “human touch” [46,49]  Fear––Frankenstein-like fears that robots, especially independent or intelligent robots, are problematic (at least in Western cultures) [46]  Japanese users more concerned about crime and war potential of robots [46]  Lack of understanding robot language and function processes [45]  Overly human-like robots are less accepted because they are perceived as creepy [45]  Fear of obsolescence [45]  Lack of social acceptance––such as the inability to conceal a robot from others [45]  Lack of resources to maintain a domestic robot [45]  Legislative control of robots [45]  Perceived lack of control [45] |
| Subjective norm |  |
| Perceived behavioral control  (the perceived ease or difficulty of performing the behavior)  (perception of internal and external constraints on behaviour ) | Perceived lack of control [45]  Perceived control of the robot [45]  Accessibility and usability [45]  User-friendly interfaces [59], ease of use [45] |
| Model of PC utilization | Job fit | For surgery––robots give more stability and control, more control to the surgeon, reduce workload on surgical assistants [61]; especially in industries like surgery where robotics already plays a role. |
| Complexities |  |
| Long term consequences (pay-off in the future) | Ability of technology to relieve human resource pressures, especially in eldercare [47]  Concerns about employment––robots are able to do certain jobs better than humans, and thus, unemployment among those industries will increase (as with other eras when mechanization put people out of work) [48]  Betterment of society  replacement of unskilled labour by robots will lead to better education standards for all people [48]  robots taking over dangerous jobs [48]  robots that make life easier would be more readily accepted [48] |

**Table S1(c).** *Cont*.

| **Theory** | **Core Measure** | **Social Robotics** |
| --- | --- | --- |
| Model of PC utilization | Affect towards use (positive or negative feeling towards it) | User acceptance  Perceived usefulness of robots [46]  Positive public views towards robots [46] facilitated by well-defined social roles for the robot [60]; social pressures for adoptions [45]  Accessibility and usability [45]  User-friendly interfaces [59], ease of use [45]  More public knowledge of robotics [48]  Novelty [48]  Sociable robots robots that communicate as humans do [45]  Entertainment value and pleasure gains [45]  Media influence [45]  Social status gain [45]  Perceived utility [45]  Perceived control of the robot [45]  Perception of the robot as a toy [45]  Positive personal experiences with robots––such as with sex robots [45]  Lack of user acceptance  Older  generations less accepting of technology in general [49]  Robots are not humans, lack “human touch” [46,49]  Fear––Frankenstein-like fears that robots, especially independent or intelligent robots, are problematic (at least in Western cultures) [46]  Japanese users more concerned about crime and war potential of robots [46]  Lack of understanding robot language and function processes [45]  Overly human-like robots are less accepted because they are perceived as creepy [45]  Fear of obsolescence [45]  Lack of social acceptance––such as the inability to conceal a robot from others [45]  Lack of resources to maintain a domestic robot [45]  Legislative control of robots [45]  Perceived lack of control [45] |
| Social factors (internalization of the reference group subjective culture, and interpersonal arguments) | Concerns about employment––robots are able to do certain jobs better than humans, and thus, unemployment among those industries will increase (as with other eras when mechanization put people out of work) [48] |
| Facilitating conditions  Objective factors in the environment that observers agree make an act easy to accomplish | Cost-effectiveness [48,62]  Efficiency, endurance, and constancy in repetitive tasks––an inherent trait of robots [48]  Practical benefits benefits [45]  Relieve human resource pressures, especially in  eldercare [47] |

**Table S1(c).** *Cont*.

| **Theory** | **Core Measure** | **Social Robotics** |
| --- | --- | --- |
| Innovation Diffusion Theory | Relative advantage | Cost-effectiveness [48,62]  Efficiency, endurance, and constancy in repetitive tasks––an inherent trait of robots [48]  Practical benefits [45] |
| Image (enhance ones image) | Social status gain [45] |
| Visibility  (one can see others using it) |  |
| Compatibility  Perceived as being consistent with the existing values needs and past experiences of potential adopters ) |  |
| Results demonstrability |  |
| Voluntariness of use |  |
| Social cognitive theory | Outcome expectations––Performance  (consequences) | Efficiency, endurance, and constancy in repetitive tasks––an inherent trait of robots [48], Practical benefits [45] |
| Outcome expectation personal  Personal consequence such as esteem and sense of accomplishment( | Social status gain [45] |
| Self efficacy | Ability to allow patients more independence from medical professionals (*i.e*., robots to help manage medication  schedules [45,47,48] |
| Affect (liking) |  |
| Anxiety |  |
| UTAUT | Performance Expectancy |  |
| Effort Expectancy |  |
| Social Influence |  |
| Facilitating Conditions  Age Gender, Experience, Voluntariness |  |
|  | Safety concerns  Robots needed for lifting patient for example, would have to have a great deal of strength which could be misdirected and result in injuries [45,56,63–67] |
| UTAUT2 | Performance Expectancy |  |
| Effort Expectancy |  |
| Social Influence |  |
| Facilitating Conditions  Age Gender Experience |  |
| Hedonistic Motivation | Costs robots are xpensive [56] |
| Price Value |  |
| Habit |  |
| Behavioural Intention |  |

**Table S1(c).** *Cont*.

| **Theory** | **Core Measure** | **Social Robotics** |
| --- | --- | --- |
| Consumer choice | Social factors  Family  Friends  Other people  Trends  Gender  Age  Entertainment |  |
| Environmental factors  Lifestyle |  |
| Personal factors  Needs  Wants  Likes  Time  Values  Emotion  Knowledge  Hobbies | Costs, robots are expensive [56] |
| Economic factors  Affordability  Value for money |  |
| Psychological factors  Planned buying  Impulse buying  To bribe award or encourage someone  Emotions  Celebration  Advertisement |  |
| Social determination theory | Intrinsic motivation  Competence  Autonomy  Relatedness  Interest  Enjoyment  Inherent satisfaction | Ethical concerns, delegating something like companionship, eldercare, healthcare, assistance for people with disabilities to robots; is unethical because they do not possess the healing qualities of humans such as compassion, empathy,  warmth, *etc.*, [68]  Is unethical because it puts the robots in a position of power over the person [54]  More autonomous robots are less likely to be accepted by policy makers and other stakeholders [54]  Robots are not humans, lack “human touch” [46,49] |
| External motivation  Compliance  External rewards and punishment |  |

**Conflict of Interest**

The authors declare no conflict of interest.

**References**

1. Franke, A.G.; Bonertz, C.; Christmann, M.; Engeser, S.; Lieb, K. Attitudes toward cognitive enhancement in users and nonusers of stimulants for cognitive enhancement: A pilot study. *AJOB Prim. Res.* **2012**, *3*, 48–57.
2. Benanti, P. Neuroenhancement in young people: Cultural need or medical technology? *AJOB Neurosci.* **2010**, *1*, 27–29.
3. Partridge, B.J.; Bell, S.K.; Lucke, J.C.; Yeates, S.; Hall, W.D. Smart drugs “As common as coffee”: Media hype about neuroenhancement. *PLoS ONE* **2011**, *6*, e28416, doi:10.1371/journal.pone.0028416.
4. Hall, W. Feeling ‘better than well’: Can our experiences with psychoactive drugs help us to meet the challenges of novel neuroenhancement methods? *EMBO Rep*. **2004**, *5*, 1105–1109.
5. Sahakian, B.J.; Morein-Zamir, S. Neuroethical issues in cognitive enhancement. *J. Psychopharmacol.* **2011**, *25*, 197–204.
6. Kher, U. Staying Sharp: Can You Find Concentration in a Bottle? *Time Magazine*, Sunday 8 January 2006.
7. Larriviere, D.; Williams, M.A. Neuroenhancement: Wisdom of the masses or “false phronesis”? *Clin. Pharmacol. Ther.* **2010**, *88*, 459–461.
8. Pasquale, F. Cognition-enhancing drugs: Can we say no? *Bull. Sci. Technol. Soc.* **2010**, *30*, 9–13.
9. Hogle, L.F. Enhancement technologies and the body. *Annu. Rev. Anthropol.* **2005**, *34*, 695–716.
10. Bell, S.K.; Lucke, J.C.; Hall, W.D. Lessons for enhancement from the history of cocaine and amphetamine use. *AJOB Neurosci.* **2012**, *3*, 24–29.
11. Schanker, B.D. Neuroenhancement in a medicated generation: Overlooked uses of cognitive stimulants. *AJOB Neurosci.* **2011**, *2*, 28–30.
12. Bostrom, N.; Roache, R. Ethical Issues in Human Enhancement. In *New Waves in Applied Ethics*; Jesper Ryberg, T.P.C.W., Ed.; Palgrave Macmillan: New York, NY, USA, 2008; pp. 120–152.
13. Warren, O.J.; Leff, D.R.; Athanasiou, T.; Kennard, C.; Darzi, A. The neurocognitive enhancement of surgeons: An ethical perspective. *J. Surg. Res.* **2009**, *152*, 167–172.
14. Butcher, J. Cognitive enhancement raises ethical concerns. *Lancet* **2003**, *362*, 132–133.
15. Cheshire, W.P., Jr. Grey matters-accelerated thought in the fast lane. *Ethics Med.* **2009**, *25*, 75–79.
16. Larriviere, D.; Williams, M.A.; Rizzo, M.; Bonnie, R.J. Responding to requests from adult patients for neuroenhancements. *Neurology* **2009**, *73*, 1406–1412.
17. Gawkowska, A. Neuroenhancement: An Ethical Analysis. In Proceedings of IEEE International Symposium on Technology and Society, 2007, Las Vegas, NV, USA, 1–2 June 2007; pp. 1–7.
18. Sahakian, B.; Morein-Zamir, S. Professor’s little helper. *Nature* **2007**, *450*, 1157–1159.
19. Turner, D.C.; Sahakian, B.J. Ethical questions in functional neuroimaging and cognitive enhancement. *Poiesis Prax.* **2006**, *4*, 81–94.
20. Ravelingien, A.; Braeckman, J.; Crevits, L.; de Ridder, D.; Mortier, E. “Cosmetic neurologyand the moral complicity argument”. *Neuroethics* **2009**, *2*, 151–162.
21. Repantis, D.; Schlattmann, P.; Laisney, O.; Heuser, I. Modafinil and methylphenidate for neuroenhancement in healthy individuals: A systematic review. *Pharmacol. Res.* **2010**, *62*, 187–206.
22. Banjo, O.C.; Nadler, R.; Reiner, P.B.; Priller, J. Physician attitudes towards pharmacological cognitive enhancement: Safety concerns are paramount. *PLoS ONE* 2010, *5*, e14322, doi:10.1371/journal.pone.0014322.
23. Berger, F.; Gevers, S.; Siep, L.; Weltring, K.M. Ethical, legal and social aspects of brain-implants using nano-scale materials and techniques. *NanoEthics* **2008**, *2*, 241–249.
24. Gordijn, B. Converging NBIC technologies for improving human performance: A critical assessment of the novelty and the prospects of the project. *J. Law Med. Ethics* **2006**, *34*, 726–732.
25. Stout, J.E.; Warren, A.; Gill, T.E. Publication trends in aeolian research: An analysis of the Bibliography of Aeolian Research. *Geomorphology* **2009**, *105*, 6–17.
26. Outram, S.M. The use of methylphenidate among students: the future of enhancement? *J. Med. Ethics* **2010**, *36*, 198–202.
27. Lynch, G.; Palmer, L.C.; Gall, C.M. The likelihood of cognitive enhancement. *Pharmacol. Biochem. Behav.* **2011**, *99*, 116–129.
28. Bostrom, N.; Sandberg, A. Cognitive enhancement: Methods, ethics, regulatory challenges. *Sci. Eng. Ethics* **2009**, *15*, 311–341.
29. Birbaumer, N. Breaking the silence: Brain-computer interfaces (BCI) for communication and motor control. *Psychophysiology* **2006**, *43*, 517–532.
30. Wolpaw, J.R.; Birbaumer, N.; McFarland, D.J.; Pfurtscheller, G.; Vaughan, T.M. Brain-computer interfaces for communication and control. *Clin. Neurophysiol.* **2002**, *113*, 767–791.
31. Hirata, M.; Matsushita, K.; Yanagisawa, T.; Goto, T.; Morris, S.; Yokoi, H.; Suzuki, T.; Yoshida, T.; Sato, F.; Sakura, O.; *et al.* Motor restoration based on the brain machine interface using brain surface electrodes: Real-time robot control and a fully implantable wireless system. *Adv. Rob.* **2012**, *26*,
    399–408.
32. Di Pino, G.; Guglielmelli, E.; Rossini, P.M. Neuroplasticity in amputees: Main implications on bidirectional interfacing of cybernetic hand prostheses. *Prog. Neurobiol.* **2009**, *88*, 114–126.
33. Fukushi, T.; Sakura, O.; Koizumi, H. Ethical considerations of neuroscience research: The perspectives on neuroethics in Japan. *Neurosci. Res.* **2007**, *57*, 10–16.
34. Kim, H.K.; Park, S.; Srinivasan, M.A. Developments in brain-machine interfaces from the perspective of robotics. *Hum. Mov. Sci.* **2009**, *28*, 191–203.
35. McCullagh, P.; Ware, M.; Mulvenna, M.; Lightbody, G.; Nugent, C.D.; McAllister, H.G. Can brain computer interfaces become practical assistive devices in the community? *Stud. Health Technol. Inform.* **2010**, *160*, 314–318.
36. Hatsopoulos, N.G.; Donoghue, J.P. The science of neural interface systems. *Annu. Rev. Neurosci.* **2009**, *32*, 249–266.
37. Birbaumer, N.; Cohen, L.G. Brain computer interfaces: Communication and restoration of movement in paralysis. *J. Physiol.* **2007**, *579*, 621–636.
38. Nicolelis, M.A.L. Actions from thoughts. *Nature* **2001**, *409*, 403–408.
39. Demetriades, A.K.; Demetriades, C.K.; Watts, C.; Ashkan, K. Brain-machine interface: The challenge of neuroethics. *Surgeon* **2010**, *8*, 267–269.
40. Clausen, J. Conceptual and ethical issues with brain-hardware interfaces. *Curr. Opin. Psychiatry.* **2011**, *24*, 495–501.
41. Garipelli, G.; Galan, F.; Chavarriaga, R.; Ferrez, P.W.; Lew, E.; Millán, R. The Use of
    Brain-Computer Interfacing in Ambient Intelligence. In *Constructing Ambient Intelligence*;
    Springer-Heidelberg: Berlin, Germany, 2008; pp. 268–285.
42. Patil, S.A. Brain gate as an assistive and solution provaiding technology for disabled people. *IFMBE Proc.* **2009**, *23*, 1232–1235.
43. Patel, P. The brain-machine interface, unplugged. *IEEE Spectr.* **2009**, *46*, 13–14.
44. Martin, A.R.; Sankar, T.; Lipsman, N.; Lozano, A.M. Brain-machine interfaces for motor control: A guide for neuroscience clinicians. *Can. J. Neurol. Sci.* **2012**, *39*, 11–22.
45. Young, J.E.; Hawkins, R.; Sharlin, E.; Igarashi, T. Toward acceptable domestic robots: Applying insights from social psychology. *Int. J. Soc. Rob.* **2009**, *1*, 95–108.
46. Syrdal, D.S.; Nomura, T.; Hirai, H.; Dautenhahn, K. Examining the Frankenstein Syndrome: An Open-Ended Cross-Cultural Survey. In *Lecture Notes in Computer Science (Including Subseries Lecture Notes in Artificial Intelligence and Lecture Notes in Bioinformatics)*; Springer Verlag: Amsterdam, The Netherlands, 2011; pp. 125–134.
47. Kuo, I.H.; Jayawardena, C.; Broadbent, E.; MacDonald, B.A. Multidisciplinary design approach for implementation of interactive services: Communication initiation and user identification for healthcare service robots. *Int. J. Soc. Rob.* **2011**, *3*, 443–456.
48. Weiss, A.; Igelsbock, J.; Wurhofer, D.; Tscheligi, M. Looking forward to a “robotic society”?: Notions of future human-robot relationships. *Int. J. Soc. Rob.* **2011**, *3*, 111–123.
49. Broadbent, E.; Stafford, R.; MacDonald, B. Acceptance of healthcare robots for the older population: Review and future directions. *Int. J. Soc. Rob.* **2009**, *1*, 319–330.
50. JaYoung, S.; Grinter, R.E.; Christensen, H.I. Domestic robot ecology: An initial framework to unpack long-term acceptance of robots at home. *Int. J. Soc. Rob.* **2010**, *2*, 417–429.
51. Tao, Y.; Wang, T.; Wei, H.; Yuan, P. A Behavior Adaptation Method for an Elderly Companion
    Robot––Rui. In *Lecture Notes in Computer Science (Including Subseries Lecture Notes in Artificial Intelligence and Lecture Notes in Bioinformatics)*; Springer Verlag: Singapore, 2010; pp. 141–150.
52. Heerink, M.; Krose, B.; Evers, V.; Wielinga, B. Assessing acceptance of assistive social agent technology by older adults: The almere model. *Int. J. Soc. Rob.* **2010**, *2*, 361–375.
53. Levy, D. The ethical treatment of artificially conscious robots. *Int. J. Soc. Rob.* **2009**, *1*, 209–216.
54. Moon, A.J.; Danielson, P.; van der Loos, H.F.M. Survey-based discussions on morally contentious applications of interactive robotics. *Int. J. Soc. Rob.* **2012**, *4*, 77–96.
55. Gelderblom, G.J.; Bemelmans, R.; Spierts, N.; Jonker, P.; de Witte, L. Development of PARO Interventions for Dementia Patients in Dutch Psycho-Geriatric Care. In *Lecture Notes in Computer Science (Including Subseries Lecture Notes in Artificial Intelligence and Lecture Notes in Bioinformatics)*; Springer Verlag: Singapore, 2010; pp. 253–258.
56. Sparrow, R.; Sparrow, L. In the hands of machines? The future of aged care. *Minds Mach.* **2006**, *16*, 141–161.
57. Spiekman, M.E.; Haazebroek, P.; Neerincx, M.A. Requirements and Platforms for Social Agents that Alarm and Support Elderly Living Alone. In Proceedings of the Third International Conference (ICSR 2011), Amsterdam, The Nethelands, 24–25 November 2011; Springer-Verlag: Berlin, Germany, 2011; pp. 226–235.
58. Lin, P.; Abney, K.; Bekey, G. Robot ethics: Mapping the issues for a mechanized world. *Artif. Intell*. **2011**, *175*, 942–949.
59. Ceccarelli, M. Problems and issues for service robots in new applications. *Int. J. Soc. Rob.* **2011**, *3*, 299–312.
60. Groom, V.; Srinivasan, V.; Bethel, C.L.; Murphy, R.; Dole, L.; Nass, C. Responses to Robot Social Roles and Social Role Framing. In Proceedings of the 12th International Conference on Collaboration Technologies and Systems, CTS 2011, Philadelphia, PA, USA, 23–27 May 2011; IEEE Computer Society: Philadelphia, PA, USA, 2011; pp. 194–203.
61. Wasen, K. Replacement of highly educated surgical assistants by robot technology in working life: Paradigm shift in the service sector. *Int. J. Soc. Rob* **2010**, *2*, 431–438.
62. Boccanfuso, L.; O’Kane, J.M. CHARLIE: An adaptive robot design with hand and face tracking for use in autism therapy. *Int. J. Soc. Rob* **2011**, *3*, 337–347.
63. Herrmann, G.; Melhuish, C. Towards safety in human robot interaction. *Int. J. Soc. Rob* **2010**, *2*, 217–219.
64. Malm, T.; Viitaniemi, J.; Latokartano, J.; Lind, S.; Venho-Ahonen, O.; Schabel, J. Safety of interactive robotics-learning from accidents. *Int. J. Soc. Rob* **2010**, *2*, 221–227.
65. Harper, C.; Virk, G. Towards the development of international safety standards for human robot interaction. *Int. J. Soc. Rob* **2010**, *2*, 229–234.
66. Haddadin, S.; Albu-Schaffer, A.; Hirzinger, G. Safety analysis for a human-friendly manipulator. *Int. J. Soc. Rob* **2010**, *2*, 235–252.
67. Giuliani, M.; Lenz, C.; Muller, T.; Rickert, M.; Knoll, A. Design principles for safety in human-robot interaction. *Int. J. Soc. Rob* **2010**, *2*, 253–274.
68. Turkle, S. Authenticity in the age of digital companions. *Interact. Stud.* **2007**, *8*, 501–517.

© 2013 by the authors; licensee MDPI, Basel, Switzerland. This article is an open access article distributed under the terms and conditions of the Creative Commons Attribution license (http://creativecommons.org/licenses/by/3.0/).
